# Supplementary material for: Assessment of Community Awareness and Screening of Chagas Disease in the Latin American Community of Greater New Orleans
Source: MDPI journal article supplement (doi:10.3390/tropicalmed8120515), 2023-12-05
Supplement: s1 [file s1]

**Supplementary Table S1.** Characteristics and knowledge of participants who screened positive for *T. cruzi* infection (n=5)

|                                                                       | n (%)   |
|-----------------------------------------------------------------------|---------|
| <i>Age categories, in years</i>                                       |         |
| 40-49                                                                 | 1 (20%) |
| 50-59                                                                 | 4 (80%) |
| <i>Sex</i>                                                            |         |
| Female                                                                | 3 (60%) |
| Male                                                                  | 2 (40%) |
| <i>Country of birth</i>                                               |         |
| Bolivia                                                               | 1 (20%) |
| Honduras                                                              | 3 (60%) |
| El Salvador                                                           | 1 (20%) |
| <i>Years living in the US.</i>                                        |         |
| <20 years                                                             | 3 (60%) |
| >20 years                                                             | 2 (40%) |
| <i>Been told by a physician of their diagnosis of Chagas disease.</i> |         |
| Yes                                                                   | 1 (20%) |
| No                                                                    | 4 (80%) |
